# Supplementary material for: Hsa_circ_001659&nbsp;Serves as a Diagnostic and Prognostic Biomarker for Colorectal Cancer
Source: Research Square preprint supplement (doi:10.21203/rs.3.rs-143396/v1), 2021-01-14
Supplement: Supplementary file 1 [file 28e20117dc2974b911a72c97.xlsx]

## Sheet: Sheet1
Additional file 6: Table S6: Intersection of gene sets regulated by circ_001659 in SW620 and LS174T cells
Test ID	Gene Symbol	log2 (sicirc_001659/siNC)	p-value (siNC vs sicirc_001659)	Significance
XLOC_002295	HMGCS1	-6.40858	0.0108696	yes
XLOC_002294	MYZAP	-6.32545	0.000166811	yes
XLOC_041295	ADAM8	-5.63226	0.00816614	yes
XLOC_032979	TWIST	-5.32665	0.0649676	no
XLOC_059316	ABCC2	-4.58664	0.000166811	yes
XLOC_041328	PIK3IP1	-4.23656	0.000166811	yes
XLOC_029501	ASB16	-3.64964	0.000166811	yes
XLOC_037138	CDH2	-3.62407	0.000166811	yes
XLOC_003577	TNFSF15	-3.47777	0.000941776	yes
XLOC_026615	PATL2	-3.30468	0.000166811	yes
XLOC_012199	PCDHA1	-3.12421	0.000166811	yes
XLOC_051365	SNCG	-3.02172	0.000166811	yes
XLOC_029119	MAP3K14	-2.68513	0.000166811	yes
XLOC_008290	VIMENTIN	-2.67566	0.000166811	yes
XLOC_030259	ZEB1	-2.65819	0.000941776	yes
XLOC_030806	RAD51AP2	-2.61187	0.000166811	yes
XLOC_020094	SPTBN5	-2.61053	0.00448809	yes
XLOC_043740	NBPF19	-2.58589	0.00661168	yes
XLOC_022376	SLCO5A1	-2.48726	0.0681868	no
XLOC_038182	CAPS	-2.48315	0.00067879	yes
XLOC_008474	TNFRSF18	-2.4781	0.000166811	yes
XLOC_022912	MMP2	-2.42862	0.000166811	yes
XLOC_018347	TP53TG3C	-2.27328	0.000166811	yes
XLOC_010286	RASA4B	-2.25525	0.00067879	yes
XLOC_051431	PACSIN3	-2.07321	0.000618466	yes
XLOC_022755	PRR26	-2.07158	0.000166811	yes
XLOC_044947	LOC102724200	-2.02931	0.000166811	yes
XLOC_019329	FBN3	-2.0256	0.000166811	yes
XLOC_004906	THEM6	-2.01655	0.00186969	yes
XLOC_059072	TAK1	-2.01098	0.0660676	no
XLOC_005922	KSR2	-1.99247	0.000166811	yes
XLOC_021200	TMEM191C	-1.98763	0.00167409	yes
XLOC_013996	PPM1J	-1.98712	0.00144196	yes
XLOC_036401	FOSL1	-1.98523	0.000618466	yes
XLOC_011865	PPAN	-1.98375	0.00067879	yes
XLOC_058470	MKK4	-1.96849	0.000166811	yes
XLOC_037515	RHOU	-1.96322	0.000866147	yes
XLOC_042138	SYNE4	-1.96218	0.000491814	yes
XLOC_047216	DNAH12	-1.9605	0.00619844	yes
XLOC_031996	DHCR7	-1.94529	0.0108696	yes
XLOC_034361	MKK6	-1.93872	0.000166811	yes
XLOC_046550	ID3	-1.93855	0.000166811	yes
XLOC_031355	AKAP3	-1.93855	0.000166811	yes
XLOC_013452	SLC37A4	-1.93496	0.000166811	yes
XLOC_034032	PRDM9	-1.93471	0.000166811	yes
XLOC_035520	GRB2	-1.93346	0.000166811	yes
XLOC_043540	NEBL	-1.93273	0.000941776	yes
XLOC_031100	LY75-CD302	-1.92766	0.000166811	yes
XLOC_025441	EPHA10	-1.92377	0.000766696	yes
XLOC_051196	ROCK	-1.91757	0.000491814	yes
XLOC_016999	ENTPD8	-1.91582	0.000166811	yes
XLOC_017084	POU3F1	-1.91475	0.000166811	yes
XLOC_023707	CPM	-1.90828	0.0611681	no
XLOC_014352	NCF2	-1.8932	0.000166811	yes
XLOC_033918	HIST1H1E	-1.88622	0.000166811	yes
XLOC_034088	ZSWIM9	-1.88516	0.00469611	yes
XLOC_006388	HIST1H2AD	-1.86655	0.000166811	yes
XLOC_028194	CBP	-1.863	0.000166811	yes
XLOC_004450	PNMT	-1.85226	0.0117168	yes
XLOC_037904	PLAU	-1.84882	0.000166811	yes
XLOC_040107	PCSK9	-1.84526	0.000166811	yes
XLOC_034508	STX19	-1.84478	0.000166811	yes
XLOC_009167	PPOX	-1.8403	0.000166811	yes
XLOC_003746	SHMT2	-1.82493	0.000166811	yes
XLOC_018605	TALN1	-1.81711	0.000166811	yes
XLOC_019709	ADORA1	-1.81491	0.000166811	yes
XLOC_024751	ADRA2B	-1.8004	0.000166811	yes
XLOC_025827	RAC1	-1.79862	0.000166811	yes
XLOC_025340	FOXD4L6	-1.79769	0.000166811	yes
XLOC_025343	RHOC	-1.79567	0.000611648	yes
XLOC_025352	LRRC45	-1.78699	0.000166811	yes
XLOC_012720	MAP2	-1.78596	0.000166811	yes
XLOC_025350	SAMD4A	-1.78215	0.000166811	yes
XLOC_038569	LASP1	-1.77836	0.0169119	yes
XLOC_020982	PPARGC1A	-1.7716	0.000166811	yes
XLOC_018469	MUC1	-1.76945	0.000166811	yes
XLOC_024146	MXRA5	-1.76053	0.000166811	yes
XLOC_024532	GALNT6	-1.75992	0.000166811	yes
XLOC_025407	RIMS1	-1.75644	0.0640106	no
XLOC_032514	PDK4	-1.75088	0.000166811	yes
XLOC_046301	ACTBL2	-1.75084	0.000166811	yes
XLOC_045219	ZNF80	-1.74642	0.000166811	yes
XLOC_025821	DNAH3	-1.73489	0.000166811	yes
XLOC_014768	DENND1C	-1.73033	0.000166811	yes
XLOC_045480	GHDC	-1.72506	0.000166811	yes
XLOC_020797	MLC	-1.72089	0.000166811	yes
XLOC_044737	HIST2H2AB	-1.70403	0.000166811	yes
XLOC_024639	TP53TG3E	-1.70403	0.00167409	yes
XLOC_024168	ST20-MTHFS	-1.69601	0.000166811	yes
XLOC_024810	SEMA3G	-1.6889	0.000618466	yes
XLOC_025433	RARRES3	-1.67042	0.000166811	yes
XLOC_024885	CLDN16	-1.66997	0.000166811	yes
XLOC_026279	PTPRCAP	-1.6688	0.000166811	yes
XLOC_025410	CYS1	-1.6686	0.000166811	yes
XLOC_024090	MMP9	-1.66729	0.000166811	yes
XLOC_024091	ARL6IP4	-1.66447	0.000491814	yes
XLOC_025463	RYR2	-1.66424	0.0068669	yes
XLOC_044809	HKDC1	-1.664	0.000166811	yes
XLOC_028249	PYGM	-1.66317	0.00676181	yes
XLOC_029143	HAP1	-1.65563	0.000166811	yes
XLOC_025502	HES5	-1.65137	0.000166811	yes
XLOC_028212	RAB26	-1.65066	0.000618466	yes
XLOC_029082	DLGAP1	-1.65041	0.000166811	yes
XLOC_028846	TIGIT	-1.64916	0.000166811	yes
XLOC_029010	LAMA2	-1.64794	0.000166811	yes
XLOC_026498	CAVIN3	-1.6465	0.00619844	yes
XLOC_019681	SLAMF7	-1.64575	0.000166811	yes
XLOC_027609	ATP6V1FNB	-1.64006	0.000166811	yes
XLOC_028014	POTEH	-1.63038	0.000166811	yes
XLOC_012596	ALDH3A1	-1.62847	0.000166811	yes
XLOC_025573	NLRC5	-1.61587	0.000166811	yes
XLOC_020265	PRX	-1.61548	0.061077	no
XLOC_025789	JSRP1	-1.60914	0.000166811	yes
XLOC_026266	TNNI1	-1.60747	0.000166811	yes
XLOC_020408	ANKRD1	-1.59435	0.000166811	yes
XLOC_029468	FILIP1	-1.5937	0.00067879	yes
XLOC_027630	NBPF14	-1.58944	0.000166811	yes
XLOC_027639	PDE3A	-1.58654	0.000166811	yes
XLOC_020720	CCDC85B	-1.56823	0.000166811	yes
XLOC_045667	SLC16A3	-1.56374	0.000166811	yes
XLOC_029033	EHBP1L1	-1.55041	0.000166811	yes
XLOC_045629	HAGHL	-1.54923	0.000166811	yes
XLOC_046973	UCN2	-1.54676	0.000618466	yes
XLOC_045200	SCX	-1.54588	0.000166811	yes
XLOC_025132	HIST1H4J	-1.53283	0.0111976	yes
XLOC_025529	NTN4	-1.52925	0.000166811	yes
XLOC_021767	SLC26A7	-1.50635	0.000166811	yes
XLOC_039249	FADS2	-1.49967	0.0168786	yes
XLOC_039060	TSPAN10	-1.4909	0.000166811	yes
XLOC_024123	ANGPTL4	-1.48436	0.000166811	yes
XLOC_021736	BRINP2	-1.48399	0.000166811	yes
XLOC_047489	SCD	-1.47697	0.000166811	yes
XLOC_027945	DUSP8	-1.47038	0.000491814	yes
XLOC_045112	MAMDC4	-1.45757	0.000166811	yes
XLOC_033637	TLN1	-1.45529	0.000166811	yes
XLOC_026238	RSPH10B2	-1.43191	0.000166811	yes
XLOC_016802	TRIM39-RPP21	-1.42045	0.000166811	yes
XLOC_036504	SQLE	-1.41716	0.0167806	yes
XLOC_044701	CROCC2	-1.41551	0.000166811	yes
XLOC_012089	CXCL3	-1.41073	0.000166811	yes
XLOC_026832	SLC9A9	-1.40175	0.000166811	yes
XLOC_045972	PXDN	-1.3964	0.0699676	no
XLOC_035977	ATP6AP1L	-1.3892	0.000166811	yes
XLOC_049483	GTF2IRD2B	-1.38242	0.000166811	yes
XLOC_047032	RASGRP3	-1.38043	0.000166811	yes
XLOC_026235	CAV1	-1.36521	0.000166811	yes
XLOC_047739	SLC46A3	-1.36348	0.000166811	yes
XLOC_020674	C4A	-1.36257	0.00908746	yes
XLOC_044580	LMO1	-1.35533	0.000166811	yes
XLOC_011755	LGALS9	-1.35455	0.000166811	yes
XLOC_024774	COL12A1	-1.34623	0.00148881	yes
XLOC_027096	CXCL8	-1.33568	0.000766696	yes
XLOC_036634	ARSJ	-1.33295	0.0679181	no
XLOC_027290	IL11	-1.33028	0.000166811	yes
XLOC_028544	SULT1A4	-1.31995	0.000166811	yes
XLOC_046807	SRMS	-1.31801	0.000166811	yes
XLOC_047145	ESPNL	-1.29427	0.000166811	yes
XLOC_002100	NLGN3	-1.28464	0.0447146	yes
XLOC_030188	VWF	-1.2717	0.000166811	yes
XLOC_027199	NTNG1	-1.25957	0.000166811	yes
XLOC_026099	RASSF6	-1.25323	0.000166811	yes
XLOC_029938	JMJD7-PLA2G4B	-1.23656	0.000166811	yes
XLOC_041612	MFSD3	-1.2326	0.00067879	yes
XLOC_021760	FOXJ1	-1.23149	0.000166811	yes
XLOC_028540	KRT75	-1.23133	0.0670941	no
XLOC_002168	ATAD3C	-1.22753	0.00704188	yes
XLOC_047872	SERPINE1	-1.21299	0.000166811	yes
XLOC_030464	TPBGL	-1.21004	0.00469611	yes
XLOC_011036	FGF2	-1.20858	0.000166811	yes
XLOC_017715	CLSTN2	-1.2057	0.000166811	yes
XLOC_021550	MAGEB4	-1.20179	0.000166811	yes
XLOC_028535	RHCE	-1.19131	0.000166811	yes
XLOC_021785	TPTE	-1.1754	0.000166811	yes
XLOC_018706	SCEL	-1.16186	0.000166811	yes
XLOC_018278	TMEM37	-1.14964	0.000166811	yes
XLOC_047243	CROCC	-1.14515	0.00611669	yes
XLOC_044569	LOC644249	-1.14242	0.000166811	yes
XLOC_029412	LOC107984638	-1.14139	0.000491814	yes
XLOC_037869	HSPB8	-1.11286	0.00168097	yes
XLOC_035332	SLC16A2	-1.08328	0.000166811	yes
XLOC_023882	DDIT3	-1.08257	0.0187768	yes
XLOC_022214	HES6	-1.0506	0.000166811	yes
XLOC_011363	NUDT8	-1.03886	0.00161666	yes
XLOC_036007	TNXB	-1.02403	0.000166811	yes
XLOC_008762	NES	-1.02151	0.00037379	yes
XLOC_000957	GREM1	-1.00811	0.0115639	yes
XLOC_036496	KRI1	1.00246	0.000133355	yes
XLOC_002629	DNAH1	1.00342	0.00409373	yes
XLOC_008486	ETDA	1.0056	0.0163736	yes
XLOC_004840	PCDHA10	1.01006	0.000133355	yes
XLOC_006396	NRCAM	1.01159	0.000726393	yes
XLOC_004465	LAMP3	1.01888	0.0429644	yes
XLOC_007714	FANCE	1.02394	0.000495354	yes
XLOC_008280	OAS3	1.03249	0.00926336	yes
XLOC_015308	PLA2G4C	1.05155	0.000133355	yes
XLOC_028480	MYO15B	1.05193	0.00390692	yes
XLOC_022345	AMN	1.06254	0.00037379	yes
XLOC_045332	SMIM11A	1.07135	0.000133355	yes
XLOC_014770	TAP2	1.08957	0.00272135	yes
XLOC_041962	TBL1X	1.09008	0.0250003	yes
XLOC_014771	ESRRB	1.09229	0.000133355	yes
XLOC_031561	TEDC1	1.09384	0.0204497	yes
XLOC_058659	EFNA1	1.09388	0.000133355	yes
XLOC_022832	MRC2	1.09447	0.000133355	yes
XLOC_026632	CNN1	1.09507	0.00453243	yes
XLOC_009246	IFI6	1.10215	0.00344333	yes
XLOC_057875	ADGRB1	1.10755	0.00770269	yes
XLOC_039002	HDAC9	1.10798	0.0127303	yes
XLOC_028369	CDH1	1.10986	0.000495354	yes
XLOC_059258	112268343	1.11078	0.00429251	yes
XLOC_031350	SPNS2	1.11204	0.000495354	yes
XLOC_030780	SCRN2	1.1179	0.0252443	yes
XLOC_004903	KRT17	1.16167	0.000133355	yes
XLOC_006899	MATK	1.16466	0.000133355	yes
XLOC_046002	DGKG	1.18668	0.000133355	yes
XLOC_022925	PEX11B	1.19027	0.000133355	yes
XLOC_034876	SLCO4A1	1.19317	0.000133355	yes
XLOC_000279	TMSB10	1.19725	0.000133355	yes
XLOC_015697	PFN1	1.20557	0.000495354	yes
XLOC_024815	DLD	1.20975	0.000133355	yes
XLOC_014635	RAC2	1.21253	0.000133355	yes
XLOC_007048	CHST1	1.2268	0.000133355	yes
XLOC_029416	ASNS	1.22956	0.000133355	yes
XLOC_027091	RHOA	1.23321	0.000133355	yes
XLOC_027598	ADAMTS10	1.2352	0.0239762	yes
XLOC_045901	GCLC	1.24736	0.00116601	yes
XLOC_030836	GPRC5A	1.25048	0.0123633	yes
XLOC_011250	RAB10	1.26299	0.0117437	yes
XLOC_035552	WASH3P	1.26328	0.00954047	yes
XLOC_036282	PACRGL	1.27849	0.0233157	yes
XLOC_029831	ZO-1	1.28762	0.012437	yes
XLOC_010796	MCM2	1.30166	0.0106911	yes
XLOC_027812	TALDO1	1.30699	0.000133355	yes
XLOC_027003	PLA2G3	1.31284	0.0091799	yes
XLOC_026033	HFE	1.33396	0.000133355	yes
XLOC_031531	DRICH1	1.33959	0.000133355	yes
XLOC_016586	NOXA1	1.34119	0.00116601	yes
XLOC_021081	HDGFL2	1.34208	0.000133355	yes
XLOC_028623	PCED1A	1.34373	0.000611643	yes
XLOC_015714	PTK6	1.34732	0.000133355	yes
XLOC_047644	GBP3	1.34736	0.00439077	yes
XLOC_025590	IFI27	1.35115	0.000133355	yes
XLOC_040642	RORA	1.36293	0.00159342	yes
XLOC_008745	LINC00665	1.36473	0.000133355	yes
XLOC_032184	HDAC3	1.36658	0.000133355	yes
XLOC_001498	CHCHD10	1.36684	0.0123496	yes
XLOC_014831	EIF2AK1	1.37264	0.00221523	yes
XLOC_045714	GCOM1	1.39697	0.000133355	yes
XLOC_002348	PGBD3	1.4002	0.000133355	yes
XLOC_042322	OASL	1.403	0.000133355	yes
XLOC_028730	CCDC102A	1.41813	0.0329217	yes
XLOC_015337	MVD	1.42552	0.000133355	yes
XLOC_035899	GNRH2	1.43396	0.0103431	yes
XLOC_012083	FOSL2	1.43451	0.023509	yes
XLOC_036598	STARD7	1.44576	0.000133355	yes
XLOC_038454	107986801	1.44648	0.000495354	yes
XLOC_047841	CYBRD1	1.44709	0.000133355	yes
XLOC_028577	ACLY	1.44804	0.000133355	yes
XLOC_004621	LRRC27	1.44906	0.000133355	yes
XLOC_010301	MRPS34	1.45128	0.00525326	yes
XLOC_005798	ARL2BP	1.45143	0.025077	yes
XLOC_005702	ZNF575	1.45233	0.00037379	yes
XLOC_007472	GPATCH1	1.45669	0.0312411	yes
XLOC_025068	ALDH18A1	1.45744	0.000133355	yes
XLOC_023517	AMDHD2	1.46128	0.0213355	yes
XLOC_005580	EPHX2	1.46479	0.000133355	yes
XLOC_002130	DHX35	1.46521	0.000336547	yes
XLOC_032731	LNP1	1.46528	0.0447542	yes
XLOC_017838	ID4	1.47064	0.0206053	yes
XLOC_036612	PAQR6	1.47302	0.00143335	yes
XLOC_040104	NACAD	1.4802	0.0193032	yes
XLOC_008112	LMNA	1.48665	0.000133355	yes
XLOC_032752	VPS26B	1.49157	0.0473143	yes
XLOC_031062	CRYAA2	1.49331	0.000133355	yes
XLOC_032949	ZFP64	1.49346	0.000133355	yes
XLOC_005035	SOWAHA	1.49982	0.000133355	yes
XLOC_043279	LOC101928841	1.50102	0.00143335	yes
XLOC_017078	ABHD14A-ACY1	1.50166	0.0233476	yes
XLOC_025472	KIFC1	1.50527	0.00437002	yes
XLOC_058842	PRSS23	1.519	0.000133355	yes
XLOC_037903	PTRH1	1.52233	0.0063629	yes
XLOC_037199	DIS3L	1.54147	0.00169353	yes
XLOC_041332	LYRM7	1.54252	0.000253463	yes
XLOC_019237	GBP1	1.54719	0.000133355	yes
XLOC_023648	FGF17	1.54915	0.000133355	yes
XLOC_021512	MPND	1.55112	0.00130296	yes
XLOC_028472	CYP1A1	1.55186	0.000133355	yes
XLOC_045874	WNT7A	1.55892	0.0340146	yes
XLOC_006777	TAP1	1.55908	0.00231743	yes
XLOC_005522	SCGB1D2	1.56815	0.000133355	yes
XLOC_045654	NEK4	1.57235	0.00190633	yes
XLOC_028386	LOC105376341	1.57378	0.00370999	yes
XLOC_045388	POLB	1.57529	0.0227115	yes
XLOC_039566	KCND1	1.59335	0.000726393	yes
XLOC_001131	U2AF1L5	1.59408	0.00143335	yes
XLOC_002819	RSAD2	1.60607	0.00321335	yes
XLOC_000555	LAT	1.62578	0.0417167	yes
XLOC_049500	LBH	1.62713	0.00037379	yes
XLOC_000556	C3	1.63883	0.000253463	yes
XLOC_043564	TRIM34	1.64075	0.00190633	yes
XLOC_051768	AVPR2	1.64917	0.0129573	yes
XLOC_032015	PPM1M	1.65785	0.0030757	yes
XLOC_047297	CMC1	1.67196	0.00713043	yes
XLOC_037185	TAS2R5	1.67488	0.0179533	yes
XLOC_000032	EFNB3	1.68639	0.0292063	yes
XLOC_004919	KCNG3	1.69045	0.011433	yes
XLOC_051265	HEXD	1.69783	0.0290572	yes
XLOC_000178	SDHB	1.69913	0.000495354	yes
XLOC_005059	CREB5	1.70175	0.0352755	yes
XLOC_031419	LOC105369535	1.70201	0.000133355	yes
XLOC_001217	MYO3B	1.70265	0.0145154	yes
XLOC_045604	TRIM22	1.70559	0.000133355	yes
XLOC_003001	FUOM	1.71305	0.030172	yes
XLOC_009466	112268338	1.71321	0.000253463	yes
XLOC_016038	IL1R1	1.71357	0.0106025	yes
XLOC_044704	FANCG	1.71603	0.0432533	yes
XLOC_039054	ARHGEF9	1.71796	0.000133355	yes
XLOC_014827	DHRS3	1.72067	0.0136159	yes
XLOC_027048	ACTR3B	1.72745	0.000133355	yes
XLOC_004805	KRT80	1.73414	0.000133355	yes
XLOC_059385	PTHLH	1.73774	0.0277125	yes
XLOC_037306	LINC00452	1.74014	0.000133355	yes
XLOC_044627	EXOSC8	1.74259	0.000133355	yes
XLOC_008122	NEURL1	1.75833	0.000253463	yes
XLOC_015303	FAM207A	1.77333	0.000133355	yes
XLOC_051636	UBA3	1.79043	0.00262177	yes
XLOC_050729	SERPINB8	1.79683	0.00127409	yes
XLOC_000897	C6orf223	1.80841	0.0197195	yes
XLOC_021248	SP8	1.81709	0.000336547	yes
XLOC_021949	HRK	1.82275	0.000133355	yes
XLOC_013139	SEMA3C	1.82837	0.000133355	yes
XLOC_043038	C8orf82	1.83973	0.00390692	yes
XLOC_017063	EWSR1	1.84498	0.022371	yes
XLOC_057357	MCCC1	1.85393	0.00105561	yes
XLOC_050358	DNPH1	1.86159	0.000133355	yes
XLOC_042879	LRRC14B	1.86264	0.000133355	yes
XLOC_025752	NPR1	1.8638	0.000945773	yes
XLOC_007457	TMEM14C	1.86984	0.000133355	yes
XLOC_000689	ATF3	1.87224	0.00602004	yes
XLOC_047030	GPNMB	1.87681	0.00553992	yes
XLOC_045649	EID3	1.87876	0.00037379	yes
XLOC_005139	ACADS	1.8949	0.000336547	yes
XLOC_006230	FRMD5	1.89954	0.000133355	yes
XLOC_005142	N6AMT1	1.91271	0.00619344	yes
XLOC_005143	RTCB	1.91422	0.000133355	yes
XLOC_002873	COL9A3	1.9228	0.000133355	yes
XLOC_016034	BATF2	1.92687	0.00553992	yes
XLOC_026379	MSMO1	1.94948	0.000495354	yes
XLOC_026134	CT45A7	1.95273	0.0233476	yes
XLOC_005031	OCEL1	1.95477	0.000133355	yes
XLOC_019917	FBXO2	1.97099	0.000133355	yes
XLOC_011454	HEY1	1.97306	0.000133355	yes
XLOC_030899	CEP131	1.9808	0.00351415	yes
XLOC_015498	NEB	1.98178	0.00331252	yes
XLOC_000811	SLC16A12	1.98516	0.00116601	yes
XLOC_051451	S100A14	1.98728	0.00116601	yes
XLOC_003018	DPP4	1.99015	0.0023217	yes
XLOC_043286	TMED7-TICAM2	1.99125	0.000133355	yes
XLOC_037864	REX1BD	2.45233	0.00291474	yes
XLOC_002652	IFIT3	2.67344	0.0105124	yes
XLOC_043053	ELN	3.36024	0.000336547	yes
