# Supplementary material for: Hsa_circ_001659&nbsp;Serves as a Diagnostic and Prognostic Biomarker for Colorectal Cancer
Source: Research Square preprint supplement (doi:10.21203/rs.3.rs-143396/v1), 2021-01-14
Supplement: Supplementary file 2 [file ac0019999e1e628cb31b605a.xlsx]

## Sheet: Sheet1
Additional file 2: Table S2. Differentially regulated circRNAs in blood of CRC patients and healthy controls from two well-established cohorts
CircRNA_name	CircRNA_ID	Host gene	Expression pattern	Fold change	FDR	Primer Forward (5'-3')	Primer Reverse (5'-3')
hsa_circ_104593	hsa_circ_0083964	ASH2L	up-regulated	2.3752	0.00059	TGCCAGACACATACAAAGATAAGC	GGTATCTGGTGGCATCTCATCC
hsa_circ_104821	hsa_circ_0001875	FAM120A	up-regulated	2.3188	0.00095	CCACCACATTACTTAGGTTGCA	CGTTCCGGCTCAGTTTTAGG
hsa_circ_104083	hsa_circ_0075828	LINC00340	up-regulated	2.4121	0.00091	TTCGGAACCAGAACGACTACG	TCTTGCTCACTAAGCCTGTCCTC
hsa_circ_001659	hsa_circ_0001182	SOX13	up-regulated	2.4681	0.02101	TCCCCTGAACATTCTCCCCAT	GAAAGCACTTGGTGAAGTCGG
hsa_circ_000984	hsa_circ_0001724	CDK6	up-regulated	2.6283	0.00108	CAGCGTCCTTTCTCAAGGGA	GACCTGATTGGCCACT
hsa_circ_104738	hsa_circ_0008732	BNC2	up-regulated	2.8719	0.00097	GGGCTGCTCACTACCAAGTTC	TCATGCTTAGTCCACTGTCTGT
hsa_circ_100823	hsa_circ_0005795	LPXN	up-regulated	2.3854	0.00098	CCAAGGTGAGTGCAGGCCAAG	GCTCTAAGCACTTGGATTAAAGC
hsa_circ_101407	hsa_circ_0032683	NEK9	up-regulated	2.9696	0.00089	CAGCACGACAACATTATTGCCTAC	ACGACGTTCCTTCTCAGACAGC
hsa_circ_104433	hsa_circ_0081342	ARPC1B	up-regulated	2.3152	0.00095	AACTTTGGGATTGTGGAAGG	ACACATTGGGGGTAGGAACA
hsa_circ_104268	hsa_circ_0078738	WDR27	up-regulated	2.4123	0.00099	CACCACCACCTTCTAAAACG	CCATCTCTTTATGTCCAAACT
hsa_circ_100290	hsa_circ_0013339	SLC30A7	up-regulated	3.1356	0.00088	TGTTGCCCAGGCTAGAGTGTAG	GGCCGAGGCAGGTGGATCACG
hsa_circ_103334	hsa_circ_0064996	SNRK	up-regulated	2.2292	0.00091	ACAGTGTTTTGTTAGTTGCTTCT	CAGCACGACAACATTATTGCCTAC
hsa_circ_104689	hsa_circ_0001824	ASAP1	up-regulated	2.3129	0.00095	GAGACACAGCAAGGGAGATC	GAAATTATTTCATAGTCATCTC
hsa_circ_000760	hsa_circ_0001895	PRRC2B	up-regulated	3.2959	0.00014	GTTCCTTACCAGCCTCCCTTT	TGAAGAGTCAATACCGCCAGA
hsa_circ_103110	hsa_circ_0004771	NRIP1	up-regulated	2.7822	0.00098	CCGGATGACATCAGAGCTACT	ACACTTCCGTCTGTCTCCAA
hsa_circ_100984	hsa_circ_0002019	FOXRED1	up-regulated	2.2229	0.00095	GCTCACCTTGGGACTCCCAATG	GTTTGTGATGTTTATTTACTC
hsa_circ_104565	hsa_circ_0002111	PSD3	up-regulated	2.8131	0.00095	GATTTAGCTTGTGTATTGGTTG	GAGCCGAGATCATGCCACTGC
hsa_circ_103737	hsa_circ_0070934	LARP1B	up-regulated	2.3114	0.00095	GGTGTATCCTGTGGAAGAAGCAT	TCACTAATTCACTTGGTGTTGGC
hsa_circ_105038	hsa_circ_0091894	FLNA	up-regulated	2.3648	0.00097	CAAGCGATTCTAGTGCCTCAG	GAAGTTTGAGACCAGTCTGGG
hsa_circ_104081	hsa_circ_0075825	LINC00340	up-regulated	2.3833	0.00098	GAGCTGTGGAGTCCAAGTGTG	TTGAGAAGGATGTTCAGTAGTAACC
hsa_circ_104595	hsa_circ_0008016	FGFR1	up-regulated	2.7337	0.00096	GAACTTCACATTCGTGCTCAC	TCCTGGTCACTGTAG TCCTCC
hsa_circ_400064	hsa_circ_0092315	PWP2	up-regulated	2.4927	0.00102	CCCAAGAGCCAAAGGAATCAC	CACTCACCTTGGCCTGCACTC
hsa_circ_104194	hsa_circ_0004712	PDE7B	up-regulated	2.1427	0.001	GATAAAAACTAACCACCATCTTGC	AAGGTAGTCTTCATCCAGCAGG
hsa_circ_103307	hsa_circ_0064557	SATB1	up-regulated	2.3128	0.00095	CACCAGTTTATCTTTGTGG	CACATAGTACAAAGATGGG
hsa_circ_100432	hsa_circ_0004777	SOD2	up-regulated	2.6417	0.00108	CTTTGATCTCAAGGAGCTGG	CTCTCTATATCCGTAATG
hsa_circ_104566	hsa_circ_0004458	PSD3	up-regulated	2.9251	0.00095	CTGAAGAACTGGCAGAG	CAAATGAAAAATCCTTCC
hsa_circ_100395	hsa_circ_0015278	KLHL20	down-regulated	2.5277	0.00097	CCCATGATGGGCACCCACATG	CAATCTGTGGGATACGGAGG
hsa_circ_104348	hsa_circ_0079891	ELMO1	down-regulated	2.3262	0.00104	GACCCTTCCTGGCGGTTAC	AGACCCACAAGCCCATTCC
hsa_circ_103454	hsa_circ_0067103	ZNF148	down-regulated	2.6674	0.00095	GGAAAGGGTCTTAGCAAG	CCCTAAATTACAGCAGGTA
hsa_circ_104135	hsa_circ_0007874	MTO1	down-regulated	2.5946	0.00109	TGCATCAGAGGCTTGGAGAA	AAGGAAGGGGTGATCTGACG
hsa_circ_001379	hsa_circ_0000516	RPPH1	down-regulated	2.2491	0.00106	CCTGTGGTTGGAGTTCAGTC	GAGCACCAACTTGAGGGCCG
hsa_circ_102246	hsa_circ_0046449	TBCD	down-regulated	3.1977	0.00092	GTCCATAAAAAGTTTTAATG	GATATACACTAGGCAAGAAATC
hsa_circ_002059	hsa_circ_0000140	KIAA0907	down-regulated	2.2161	0.0009	TCGACAGTCAGCCGCATCTTCTTT	ACCAAATCCGTTGACTCCGACCTT
hsa_circ_100833	hsa_circ_0022383	FADS2	down-regulated	3.0221	0.00091	GCTAGTGATTTCAGTGATATGGAG	GTTGGATTTCTTTGTCTTGAGC
hsa_circ_101541	hsa_circ_0035560	ANXA2	down-regulated	2.6759	0.00095	TCCGACAGCAACAGGAAATG	TGGACCTCGGACTGGGATAA
hsa_circ_102002	hsa_circ_0003505	USP22	down-regulated	2.1852	0.0011	GGGCATCAGGAGCAAACTTA	CTGGCGAATTAAAGCCATTC
hsa_circ_000695	hsa_circ_0001336	EEFSEC	down-regulated	2.5551	0.0009	GATGGTGGCATCATCATCAGTCTCAG	CTTTATTTGTTTTGTATCTGG
hsa_circ_100834	hsa_circ_0022392	FADS2	down-regulated	2.2428	0.00101	GATCTGCAGGAATCCTTATAG	GTTCACCCCAACTGCATTGGCG
hsa_circ_101539	hsa_circ_0005402	ANXA2	down-regulated	2.8371	0.00088	GACTTATGAAATGCTGTTG	CTCACTGTTTCTGAAGTAAG
hsa_circ_103636	hsa_circ_0001410	DCUN1D4	down-regulated	2.7222	0.00088	CAGATGACCTGGTATGGCAAC	CTGTTAGTGTGTATGGACC
hsa_circ_100777	hsa_circ_0021553	MPPED2	down-regulated	2.4947	0.00099	GATTGTCTTATAAATCTCCTG	CCTTATCCTTCTGCACCCAG
hsa_circ_102594	hsa_circ_0052012	POLD1	down-regulated	2.3219	0.00102	AGTACATTTTTGGCATAAATCAAG	GTAAATATAAACAAGGTCC
hsa_circ_104983	hsa_circ_0089974	NHS	down-regulated	2.8625	0.00095	CACTGACTTGCCACTCCTTTG	GTCTGTTAGGTGGATGCTTTGT
hsa_circ_001059	hsa_circ_0000554	LIN52	down-regulated	2.2261	0.00118	GCTCGGTGACCTTGGTCTGG	GCGTGTTGGGATGCCTCTGT
hsa_circ_101877	hsa_circ_0004519	RFWD3	down-regulated	2.3287	0.00091	ATTGCAGATGCCTTCAACCTC	CTTCCTTTGCTAAATTCCCAGA
hsa_circ_104739	hsa_circ_0086419	BNC2	down-regulated	2.3341	0.00095	GGACCCTAAAATTTGAATTTCA	CTCCCAAGTAGCTGGGACTAC
hsa_circ_102913	hsa_circ_0058058	ATIC	down-regulated	2.4512	0.00096	CTGTAAGCCAGGAGTGGT	GTGTGTTACTGGAAGAACTG
hsa_circ_104084	hsa_circ_0075829	LINC00340	down-regulated	2.3857	0.00101	CCACTGGCAAAGAGTCACCTAAA	ATTCCCTGGCAGTTCCGTGTA
hsa_circ_001830	hsa_circ_0001370	YEATS2	down-regulated	3.1275	0.00098	ACGCATTCTTCGAGACCTCT	TGCCTGTAACTCCTCTTCAGT
hsa_circ_101419	hsa_circ_0032832	STON2	down-regulated	2.3676	0.00046	GAGTTGGTATCTCACAGCTGTG	CAGCTGAAGAATTCAACTGAAGG
hsa_circ_104370	hsa_circ_0080189	TNS3	down-regulated	2.9811	0.00097	TGAGCTTCGGGGAGGTGAGT	CAAGGGACATGGGAGTGGAGT
hsa_circ_102612	hsa_circ_0005085	ASAP2	down-regulated	2.7499	0.00089	CTAACTATGGTCGGACGGATGA	CAATGATAAACCACAGACTTCGC
hsa_circ_100367	hsa_circ_0014879	DCAF8	down-regulated	2.5222	0.00088	GTGTTAAATACCTTGATCTACC	CTAGGACTTCATCTATTCAAAT
